# Supplementary material for: Preparation of expandable vertically aligned carbon nanotube arrays/polydimethylsiloxane membrane by a modular splicing method and its application inin situethanol recovery from ethanol fermentation
Source: Royal Society of Chemistry journal article supplement (doi:10.1039/d3nr01632c), 2023-01-01
Supplement: d3nr01632c1.pdf [file d3nr01632c1.pdf]

1

## Supplementary Information

2

### 3 **Preparation of expandable vertically aligned carbon nanotube** 4 **arrays/polydimethylsiloxane membrane by modular splicing method** 5 **and its application in *in situ* ethanol recovery from ethanol** 6 **fermentation**

7

8 Decai Yang,<sup>‡a,b,c</sup> Wei Kang,<sup>‡\*a,c</sup> Xueyang Fang,<sup>‡\*d</sup> Fei Gao,<sup>e</sup> Chi Cheng,<sup>a,c</sup> Zongbin

9 Zhao,<sup>f</sup> Shi Chen,<sup>b</sup> Yongming Bao<sup>a,c</sup> and Chuang Xue<sup>\*a,c</sup>

10

11 <sup>a</sup> School of Bioengineering, Engineering Research Center of Application and  
12 Transformation for Synthetic Biology, Dalian University of Technology, Dalian  
13 116024, China. E-mail: kangwei@dlut.edu.cn, xue.l@dlut.edu.cn

14 <sup>b</sup> Intensive Care Unit, Biomedical Research Center, Shenzhen Institute of Translational  
15 Medicine, Shenzhen Second People's Hospital, the First Affiliated Hospital of  
16 Shenzhen University, Guangdong Key Laboratory for Biomedical Measurements and  
17 Ultrasound Imaging, National-Regional Key Technology Engineering Laboratory for  
18 Medical Ultrasound, School of Biomedical Engineering, Shenzhen University Medical  
19 School, Shenzhen 518060, China

20 <sup>c</sup> Ningbo Institute of Dalian University of Technology, Ningbo 315016, China

21 <sup>d</sup> Shenzhen Key Laboratory of Nanozymes and Translational Cancer Research,  
22 Department of Otolaryngology, Shenzhen Institute of Translational Medicine, The First  
23 Affiliated Hospital of Shenzhen University, Shenzhen Second People's Hospital,  
24 Shenzhen 518035, China. E-mail: FANGXueyang0210@163.com

1 <sup>e</sup> Key Laboratory of Materials Modification by Laser, Ion, and Electron Beams  
2 (Ministry of Education), School of Physics and Optoelectronic Technology, Dalian  
3 University of Technology, Dalian 116024, China

4 <sup>f</sup> Carbon Research Laboratory, State Key Laboratory of Fine Chemicals, School  
5 Chemical Engineering, Dalian University of Technology, Dalian 116024, China

6

7 ‡ These authors contributed equally to this work.

## 1 Pervaporation experiment

2 The effective area of membrane in membrane module was 58 cm<sup>2</sup>. All the  
3 pervaporation experiments were conducted at the feed flow rate of 1.2 L/min and a  
4 vacuum of < 100 Pa on the permeate side of the membrane. The permeate was collected  
5 in a cold trap immersed in liquid nitrogen.

6 The flux ( $J$ , g/m<sup>2</sup> h), separation factor ( $\alpha$ ) and Pervaporation Separation Index  
7 ( $PSI$ ) were calculated as follows:

$$8 \quad J = \frac{w}{At} \quad (1)$$

$$9 \quad x_i \text{ or } y_i = \frac{C_i}{(1000 - C_i/\rho_i + C_i)}$$

10 (2)

$$11 \quad \alpha_i = \frac{y_i/(1 - y_i)}{x_i/(1 - x_i)} \quad (3)$$

$$12 \quad PSI = J\alpha_i \quad (4)$$

13 where  $W$  (g) is the weight of the recovered permeate,  $A$  (m<sup>2</sup>) is the membrane area, and  
14  $t$  is the time (h) for the sample collection.  $x_i$  and  $y_i$  are the weight fractions of  
15 components in the feed and permeate samples, respectively.  $C_i$  is the titer (g/L) of  
16 components in the feed and permeate samples.  $\rho_i$  is the relative density (g/cm<sup>3</sup>) of  
17 components in the feed and permeate samples. The definition and function of  $PSI$  can  
18 be used to characterize as the separation effectiveness of pervaporation possessing with  
19 different separation factor and flux.

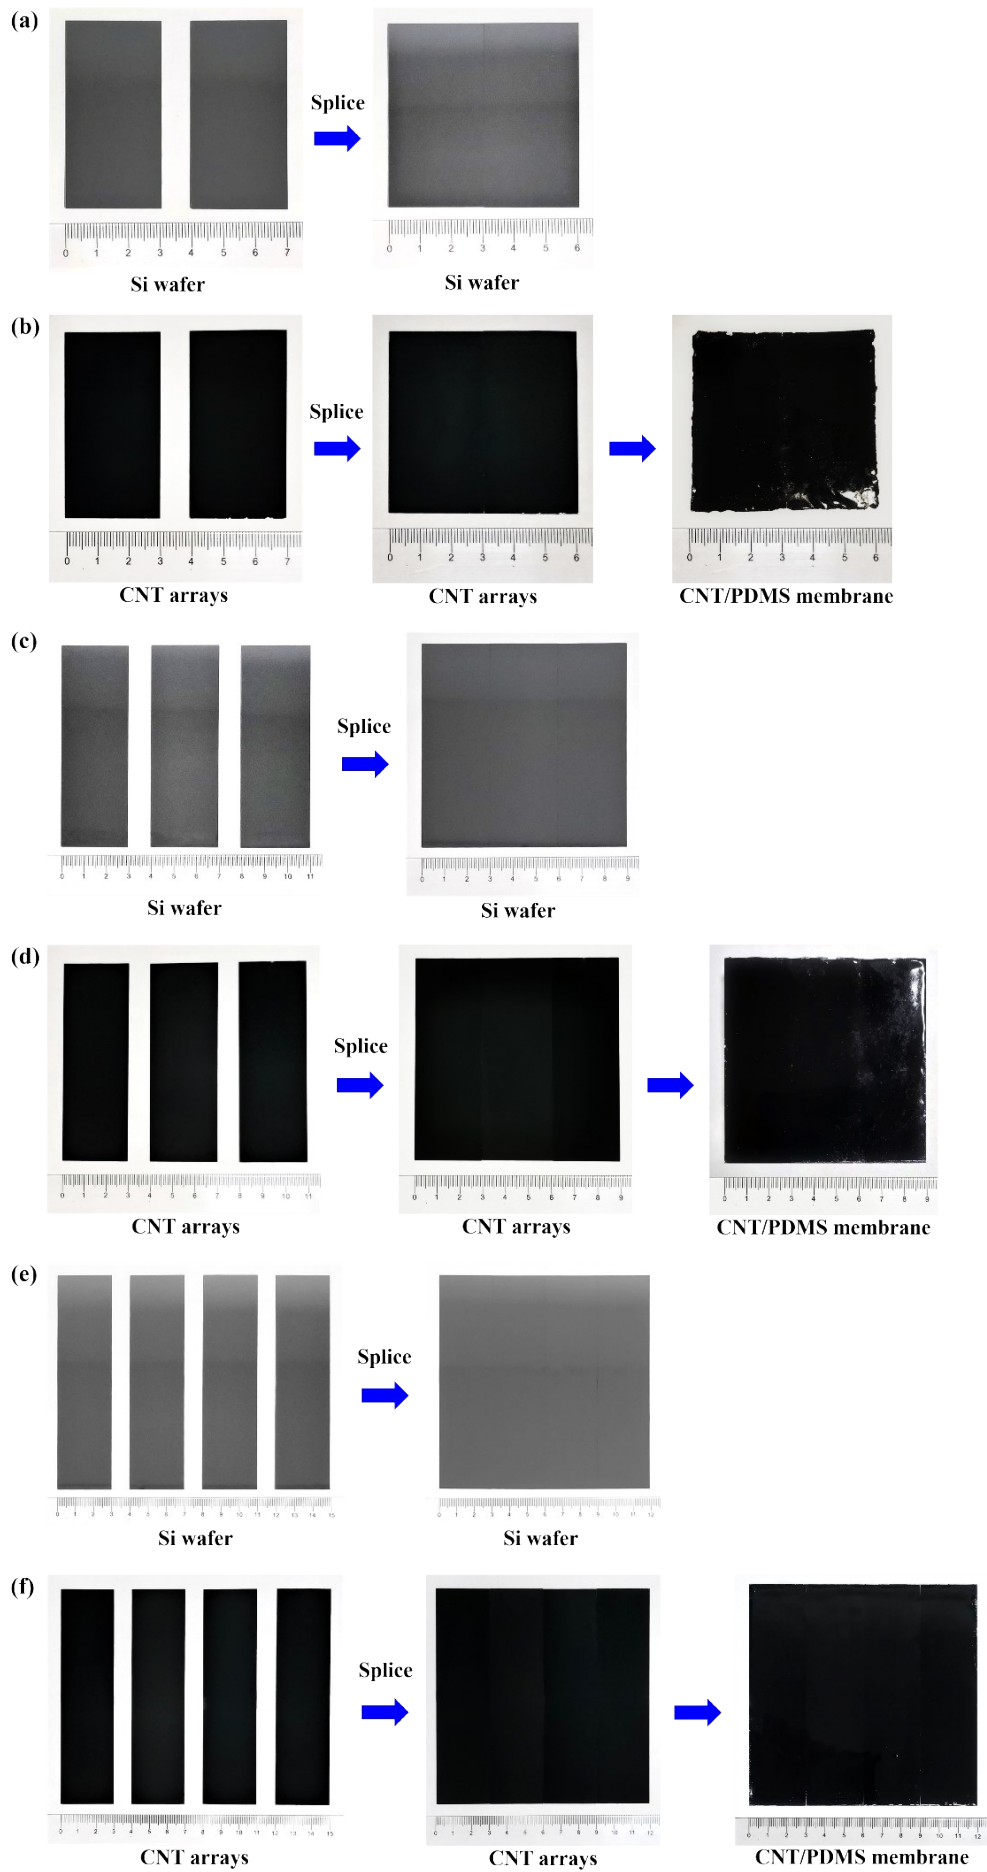

1 **Figure. S1** Photos of Si wafers, CNT arrays and CNT arrays/PDMS membranes with  
2 different sizes: a) individual Si wafers ( $3\text{ cm} \times 6\text{ cm}$ ) and their spliced Si wafers; b)  
3 individual CNT arrays ( $3\text{ cm} \times 6\text{ cm}$ ), the spliced CNT arrays, and the prepared CNT  
4 arrays/PDMS membrane ( $6\text{ cm} \times 6\text{ cm}$ ); c) individual Si wafers ( $3\text{ cm} \times 9\text{ cm}$ ) and their  
5 spliced Si wafers; d) individual CNT arrays ( $3\text{ cm} \times 9\text{ cm}$ ), the spliced CNT arrays,  
6 and the prepared CNT arrays/PDMS membrane ( $9\text{ cm} \times 9\text{ cm}$ ); e) individual Si wafers  
7 ( $3\text{ cm} \times 12\text{ cm}$ ) and their spliced Si wafers; f) individual CNT arrays ( $3\text{ cm} \times 12\text{ cm}$ ),  
8 the spliced CNT arrays, and the prepared CNT arrays/PDMS membrane ( $12\text{ cm} \times 12$   
9  $\text{cm}$ ).
